# Supplementary material for: Role of maternal mental health disorders on stillbirth and infant mortality risk: a protocol for a systematic review and meta-analysis
Source: PubMed Central journal article supplement — BMJ Open. 2020 May 5;10(5):e036280. doi: 10.1136/bmjopen-2019-036280 (PMC7228523; doi:10.1136/bmjopen-2019-036280), 2020-05-05
Supplement: bmjopen-2019-036280supp001.pdf [file bmjopen-2019-036280supp001.pdf]

## Appendix A. databases and searching techniques

**Medline (Ovid)**

1. mental disorders/ or anxiety disorders/ or "bipolar and related disorders"/ or mood disorders/ or "p spectrum and other psychotic disorders"/ or substance-related disorders/
2. Depression/
3. (depression or anxiety or mental disorders or schizophrenia or psychosis).tw.
4. 1 or 2 or 3
5. Fetal Mortality/ or Child Mortality/ or Infant Mortality/ or Perinatal Mortality/
6. Infant Death/ or Fetal Death/ or Perinatal Death/
7. (stillbirth or fetal death or neonatal death or neonatal mortality or perinatal death or perinatal mortality or infant death or infant mortality).tw.
8. pregnancy outcome.tw.
9. 5 or 6 or 7 or 8
10. 4 and 9
11. limit 10 to (human and english language)

**EMBASE (Ovid)**

1. mood disorder/ or psychosis/ or schizophrenia spectrum disorder/
2. perinatal depression/ or depression/
3. anxiety/ or anxiety disorder/
4. (psychiatric disorder or mental disorder or mental disorders or psychosis or panic or schizophrenia or depression).tw.
5. 1 or 2 or 3 or 4
6. fetus mortality/
7. child death/
8. fetus death/ or stillbirth/
9. infant mortality/ or perinatal mortality/ or perinatal death/ or fetus death/
10. (stillbirth or fetal death or neonatal death or neonatal mortality or perinatal death or perinatal mortality or infant death or infant mortality).tw.
11. pregnancy outcome/
12. 6 or 7 or 8 or 9 or 10 or 11
13. 5 and 12
14. limit 13 to (human and english language)

**PsycINFO (Ovid)**

1. anxiety/ or panic attack/ or panic disorder/
2. affective disorders/ or anxiety disorders/ or bipolar disorder/ or chronic mental illness/ or psychosis/ or "substance related and addictive disorders"/
3. (depression or anxiety or mental disorders or schizophrenia or psychosis).tw.
4. 1 or 2 or 3
5. pregnancy outcomes/
6. Sudden Infant Death/
7. (stillbirth or fetal death or neonatal death or neonatal mortality or perinatal death or perinatal mortality or infant death or infant mortality).tw.
8. 5 or 6 or 7
9. 4 and 8
10. limit 9 to (human and english language)

**Scopus**

Will be used to search citations and references of relevant recorders identified from the three main databases.
